# Supplementary material
Source: publisher figshare collection journal article supplement (https://acs.figshare.com/ndownloader/files/4119817)
Supplement: Supplementary file 1 [file 4119817]

# **Organization of Metal Nanoparticles for Surface Enhanced Spectroscopy: A Difference in Size Matters**

Reshmi Thomas, and R. S. Swathi\*

*School of Chemistry, Indian Institute of Science Education and Research-Thiruvananthapuram,  
Kerala, India - 695016*

E-mail: [swathi@iisertvm.ac.in](mailto:swathi@iisertvm.ac.in)

---

\*To whom correspondence should be addressed

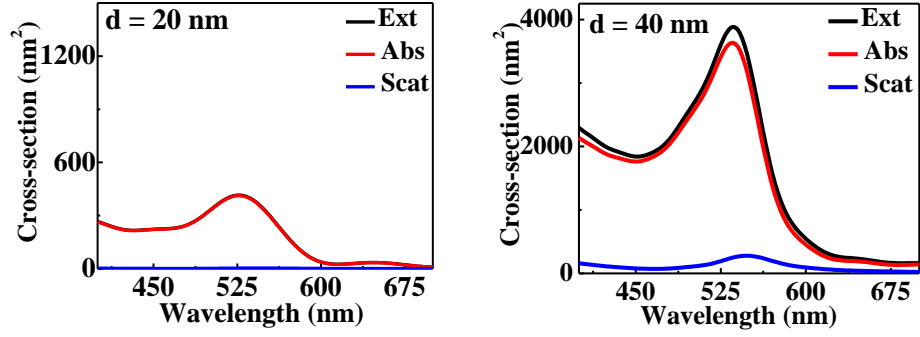

Figure S1: Simulated extinction spectra for the monomeric  $d = 20 \text{ nm}$  and  $d = 40 \text{ nm}$  Au NPs. Relative contributions of the absorption and the scattering to the extinction are also shown.

**Table S1: SERS EFs evaluated at  $\lambda_{max}$  and at  $633 \text{ nm}$  for a typical probe in the vicinity of the monomeric Au NPs.**

| $d \text{ (nm)}$ | $\lambda_{max} \text{ (nm)}$ | $I(\lambda_{max})$ | $I(633 \text{ nm})$ | $EF(\lambda_{max})$ | $EF(633 \text{ nm})$ |
|------------------|------------------------------|--------------------|---------------------|---------------------|----------------------|
| 20               | 527                          | 23.5               | 13.7                | $5.5 \times 10^2$   | $1.9 \times 10^2$    |
| 40               | 535                          | 36.7               | 19.5                | $1.3 \times 10^3$   | $3.8 \times 10^2$    |

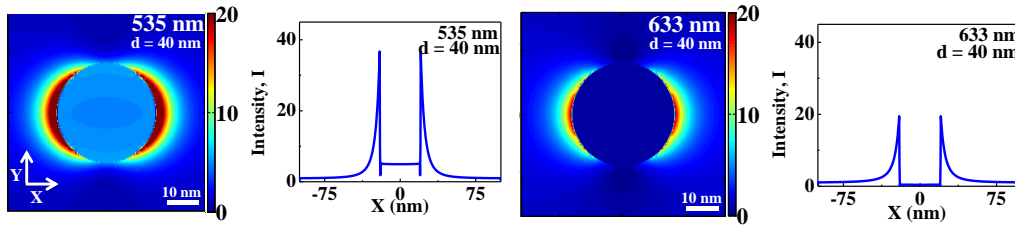

Figure S2: The electric field intensity profiles in the vicinity of the monomeric  $d = 40 \text{ nm}$  Au NP at its  $\lambda_{max}$  and at  $633 \text{ nm}$ .

**Table S2: SERS EFs evaluated at  $\lambda_{max}$  and at  $633 \text{ nm}$  for a typical probe in the vicinity of Au NP dimers for various gap sizes for the  $\perp$  polarization of the incident light.**

| $s \text{ (nm)}$ | $\lambda_{max} \text{ (nm)}$ | $I(\lambda_{max})$ | $I(633 \text{ nm})$ | $EF(\lambda_{max})$ | $EF(633 \text{ nm})$ |
|------------------|------------------------------|--------------------|---------------------|---------------------|----------------------|
| 3                | 524                          | 20.3               | 13.1                | $4.1 \times 10^2$   | $1.7 \times 10^2$    |
| 6                | 525                          | 20.6               | 13.5                | $4.2 \times 10^2$   | $1.8 \times 10^2$    |
| 9                | 527                          | 21.8               | 13.8                | $4.8 \times 10^2$   | $1.9 \times 10^2$    |
| 12               | 527                          | 22.1               | 14.0                | $4.9 \times 10^2$   | $1.9 \times 10^2$    |
| 15               | 527                          | 22.3               | 14.2                | $4.9 \times 10^2$   | $2.0 \times 10^2$    |
| 40               | 529                          | 24.1               | 14.9                | $5.8 \times 10^2$   | $2.2 \times 10^2$    |

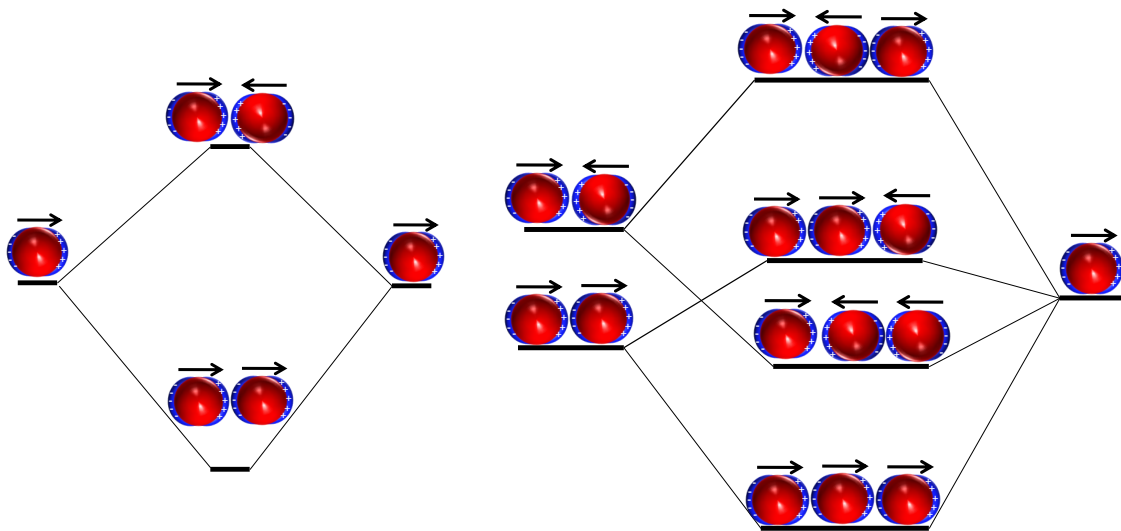

Figure S3: A schematic of the plasmon coupling in homodimers and homotrimers of metallic nanoparticles for the || polarization of the incident light.

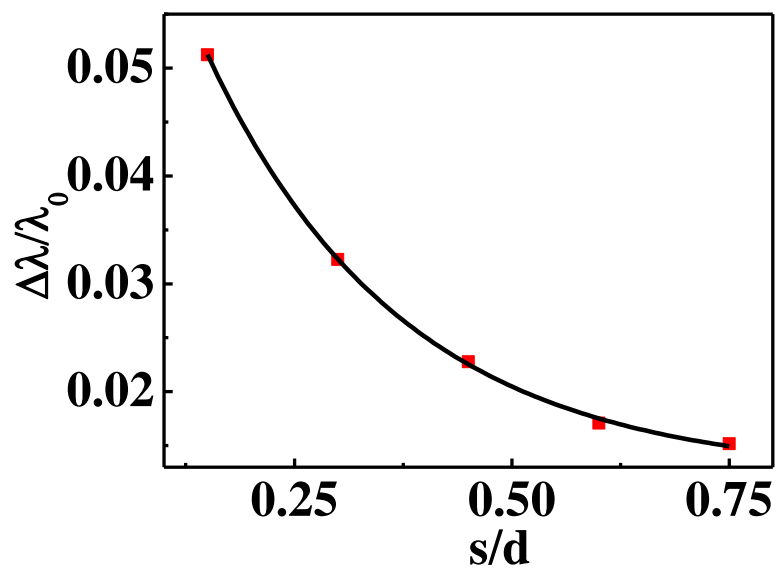

Figure S4: The fit of the extinction data of the homodimers for the || polarization of the incident light to the plasmon ruler equation.

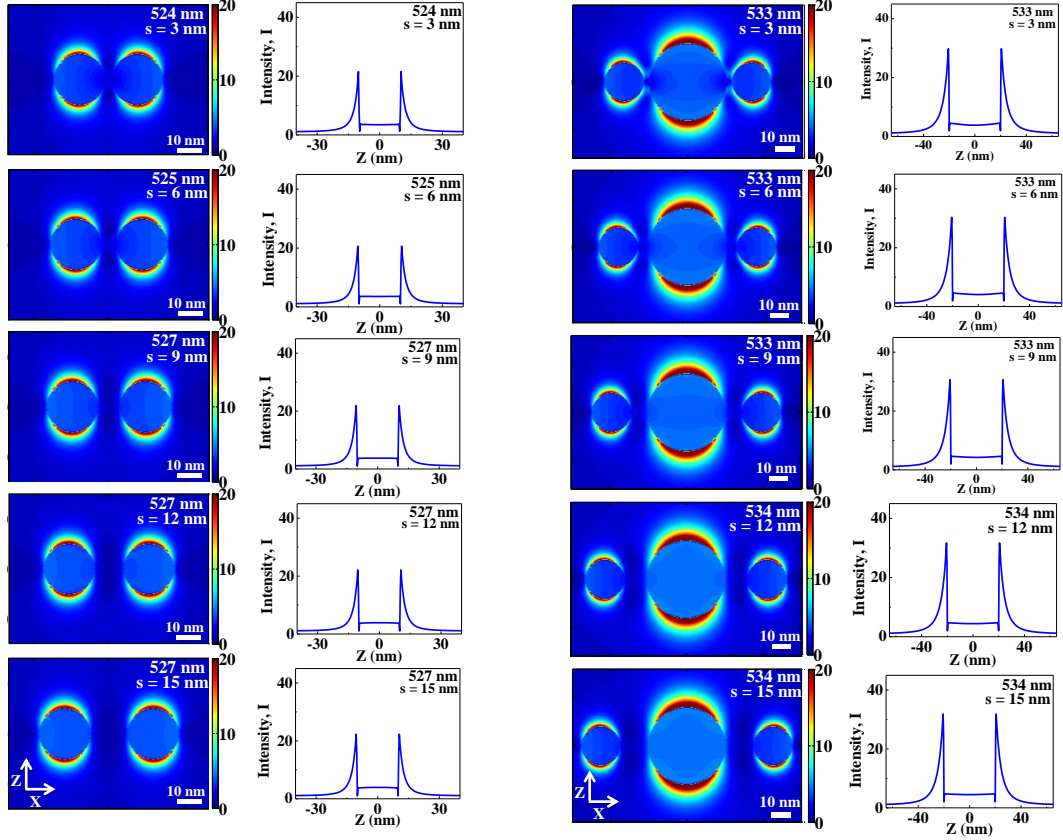

Figure S5: The electric field intensity profiles in the vicinity of the Au NP dimers and symmetric trimers at their  $\lambda_{max}$  as a function of the gap size for the  $\perp$  polarization of the incident light. The plots of  $I$  vs  $Z$  show the cuts from the contours taken through the centers of the  $d = 20$  nm and  $d = 40$  nm NPs for the homodimers and the symmetric trimers respectively.

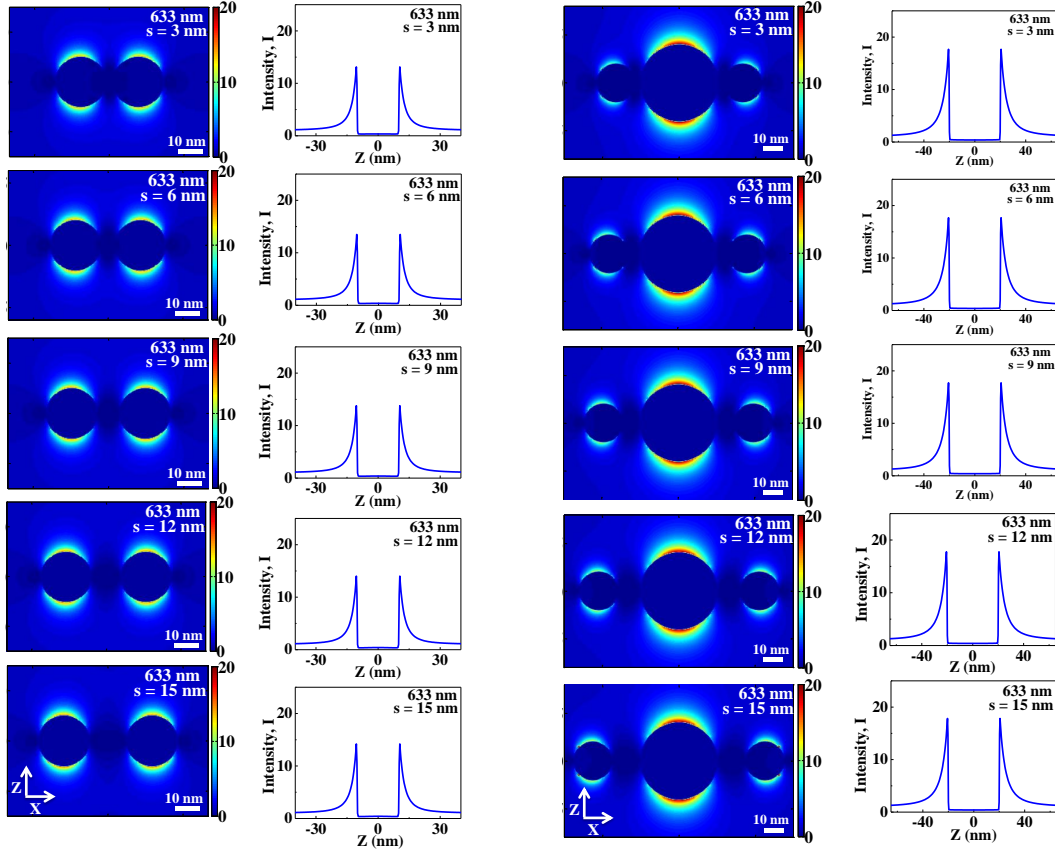

Figure S6: The electric field intensity profiles in the vicinity of the Au NP dimers and symmetric trimers at  $633\text{ nm}$  as a function of the gap size for the  $\perp$  polarization of the incident light. The plots of  $I$  vs  $Z$  show the cuts from the contours taken through the centers of the  $d = 20\text{ nm}$  and  $d = 40\text{ nm}$  NPs for the homodimers and the symmetric trimers respectively.

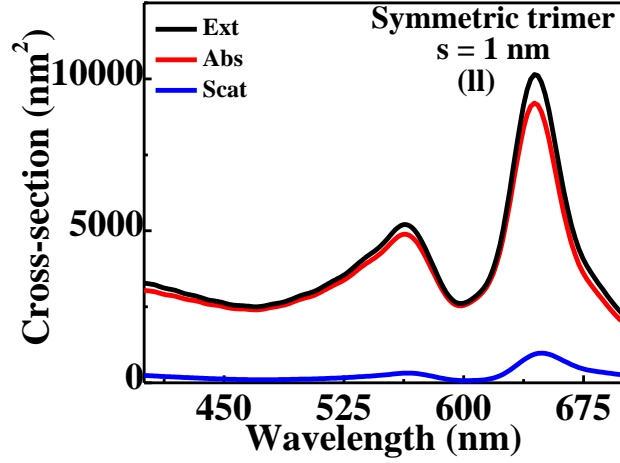

Figure S7: Simulated extinction spectrum of symmetric trimers for a gap size of  $s = 1 \text{ nm}$  for the  $\parallel$  polarization of the incident light. Relative contributions of the absorption and the scattering to the extinction are also shown.

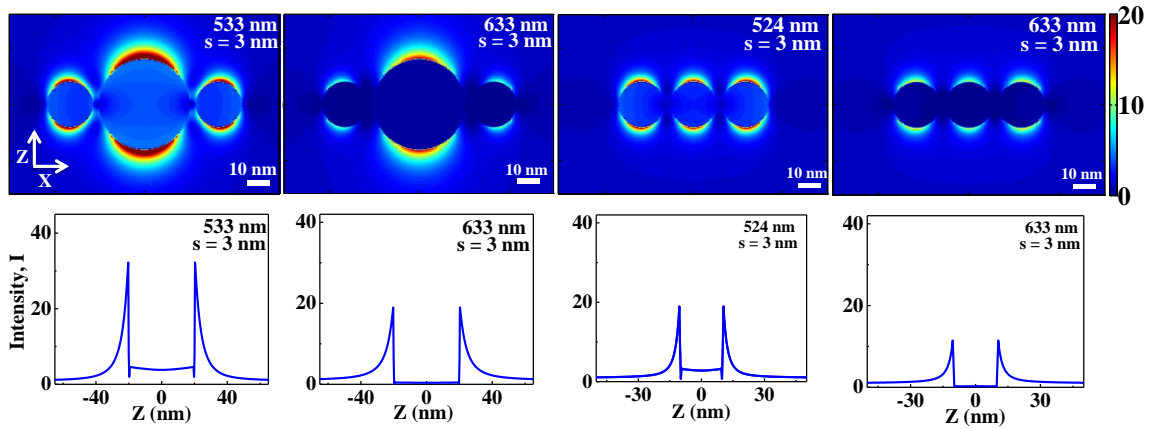

Figure S8: The electric field intensity profiles in the vicinity of the Au NP symmetric trimers and homotrimers with  $s = 3 \text{ nm}$  at their  $\lambda_{max}$  as well as at  $633 \text{ nm}$  for the  $\perp$  polarization of the incident light. The plots of  $I$  vs  $Z$  show the cuts from the contours taken through the centers of the  $d = 40 \text{ nm}$  and  $d = 20 \text{ nm}$  NPs for the symmetric trimers and the homotrimers respectively.

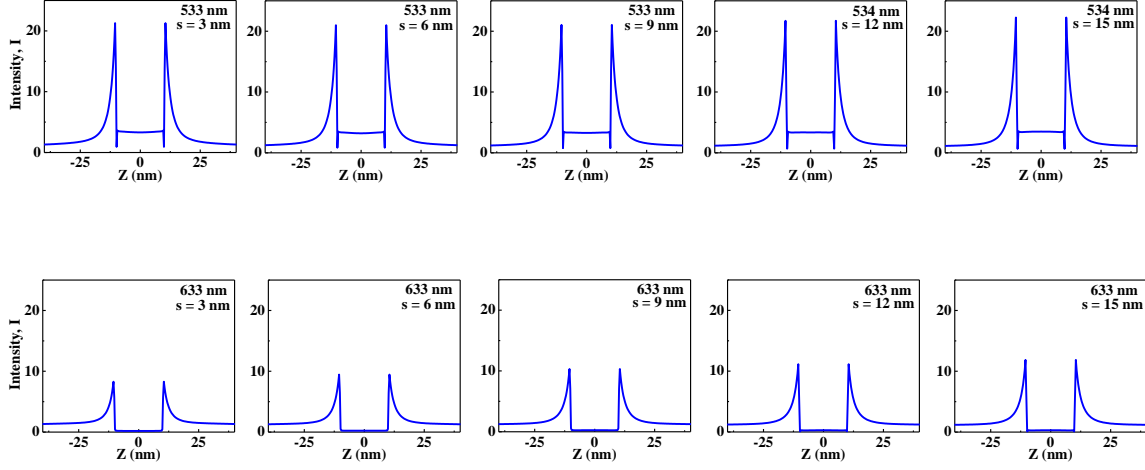

Figure S9: The electric field intensity profiles in the vicinity of the Au NP symmetric trimers for various gap sizes for the  $\perp$  polarization of the incident light. The plots show the cuts from the contours shown in Figure S5 and Figure S6 taken through the centers of the  $d = 20 \text{ nm}$  NPs.

**Table S3: SERS EFs evaluated at  $\lambda_{max}$  and at 633 nm for a typical probe in the vicinity of Au NP symmetric trimers for various gap sizes for the  $\perp$  polarization of the incident light. Note that the intensities and the EFs are evaluated at two different locations of the symmetric trimers, namely the hottest spots and the hot spots. ‘\*’ refers to the intensities and the EFs evaluated at the hottest spots.**

| $s \text{ (nm)}$ | $\lambda_{max} \text{ (nm)}$ | $I^*(\lambda_{max})$ | $I^*(633 \text{ nm})$ | $EF^*(\lambda_{max})$ | $EF^*(633 \text{ nm})$ |
|------------------|------------------------------|----------------------|-----------------------|-----------------------|------------------------|
| 3                | 533                          | 29.8                 | 17.7                  | $8.9 \times 10^2$     | $3.1 \times 10^2$      |
| 6                | 533                          | 30.3                 | 17.7                  | $9.2 \times 10^2$     | $3.1 \times 10^2$      |
| 9                | 533                          | 30.6                 | 17.7                  | $9.4 \times 10^2$     | $3.1 \times 10^2$      |
| 12               | 534                          | 31.7                 | 17.7                  | $1.0 \times 10^3$     | $3.1 \times 10^2$      |
| 15               | 534                          | 31.8                 | 17.8                  | $1.0 \times 10^3$     | $3.2 \times 10^2$      |
| 40               | 536                          | 34.1                 | 18.1                  | $1.2 \times 10^3$     | $3.3 \times 10^2$      |
| $s \text{ (nm)}$ | $\lambda_{max} \text{ (nm)}$ | $I(\lambda_{max})$   | $I(633 \text{ nm})$   | $EF(\lambda_{max})$   | $EF(633 \text{ nm})$   |
| 3                | 533                          | 21.3                 | 8.3                   | $4.5 \times 10^2$     | $6.9 \times 10^1$      |
| 6                | 533                          | 21.2                 | 9.4                   | $4.5 \times 10^2$     | $8.8 \times 10^1$      |
| 9                | 533                          | 21.3                 | 10.3                  | $4.5 \times 10^2$     | $1.1 \times 10^2$      |
| 12               | 534                          | 21.7                 | 11.1                  | $4.7 \times 10^2$     | $1.2 \times 10^2$      |
| 15               | 534                          | 22.2                 | 11.9                  | $4.9 \times 10^2$     | $1.4 \times 10^2$      |
| 40               | 536                          | 25.1                 | 13.7                  | $6.3 \times 10^2$     | $1.9 \times 10^2$      |

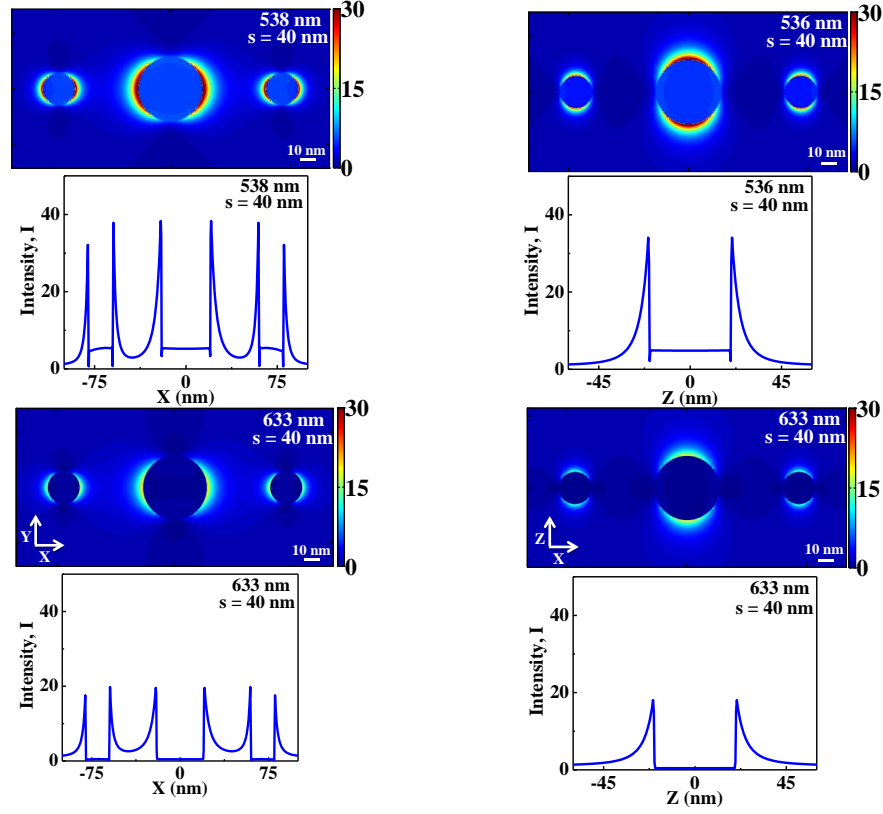

Figure S10: The electric field intensity profiles in the vicinity of the Au NP symmetric trimers for  $s = 40 \text{ nm}$  at their  $\lambda_{max}$  and at  $633 \text{ nm}$  for the  $\parallel$  as well as the  $\perp$  polarizations of the incident light. The plots of  $I$  vs  $Z$  show the cuts from the contours taken through the centers of the  $d = 40 \text{ nm}$  NPs.
